# Supplementary material
Source: Elsevier journal article supplement (https://www.sciencedirect.com/science/article/pii/S1138359321000575)
Supplement: mmc1 [file S1138359321000575:mmc1.doc]

**MATERIAL SUPLEMENTARIO**

**Anexo 1.** **Recomendaciones de vacunación frente a neumococo en adultos en la Comunidad de Madrid en 2018.**

| Grupo poblacional | Nueva pauta | | **¿Qué se le administraba hasta ahora?** |
| --- | --- | --- | --- |
| **SIN VACUNA PREVIA** | **CON VACUNA PREVIA**  (al menos una dosis de VNP23) |
| **60 y más años**  sin factor de riesgo | **VNC13** |  | **VNP23**  ***Cohortes 1956-57: VNC13** |
| **Adultos (18 y más años)**  con patología crónica de base | **VNC13** | **VNC13**  (intervalo de 1 año) | **VNP23**  **+**  **Revacunación**  **a los 60 años** |
| Personas de **cualquier edad** y de alto riesgo | **VNC13 + VNP23**  (intervalo de 8 semanas)  **+**  **Revacunación**  **a los 5 años**  **con VNP23** | **VNC13**  (intervalo de 1 año)  **+**  **Revacunación**  **a los 5 años**  **con VNP23** | **VNC13 + VNP23**  **+**  **Revacunación**  **a los 5 años**  **con VNP23** |
| **VNP23: vacuna neumocócica polisacárida 23-valente**  **VNC13: vacuna neumocócica conjugada 13-valente** | | | |

**Anexo 2. Enfermedades y situaciones de riesgo de padecer infecciones neumocócicas graves o frecuentes en la edad adulta clasificadas y consideradas así para la pauta del calendario vacunal de 2018 en la CM.**

| GRUPO CON PATOLOGÍA CRÓNICA | ENFERMEDAD O SITUACIÓN |
| --- | --- |
|  | Enfermedades cardiovasculares, pulmonares o metabólicas de evolución crónica |
| Insuficiencia renal crónica, síndrome nefrótico, receptores de hemodiálisis |
| Enfermedad hepática crónica y cirrosis hepática |
| Diabetes Mellitus |
| Alcoholismo y tabaquismo crónico |
| Fístula de líquido cefalorraquídeo |
| Implantes cocleares o susceptibles de recibirlos |
| Receptores de concentrados de factores de coagulación |
| Antecedentes de enfermedad invasora por *S. pneumoniae* |
| GRUPO DE  ALTO RIESGO | **ENFERMEDAD O SITUACIÓN** |
| Asplenia | Anatómica. Si esplenectomía quirúrgica vacunar al menos 2 semanas antes |
| Funcional: drepanocitosis, déficit de los componentes finales del complemento y otras hemoglobinopatías que cursen con asplenia funcional (ej. esferocitosis) |
| Inmunodepresión | Infección por VIH (Virus inmunodeficiencia humana). |
| Enfermedades inmunosupresoras |
| Tratamiento con fármacos inmunosupresores o quimioterapia |

**Anexo 3. Enfermedades o situaciones que podemos identificar en el sistema de información de AP según los códigos CIAP-2 para clasificar a las personas como del grupo con patología crónica de base o del grupo de alto riesgo.**

| **GRUPO DE RIESGO CON**  **PATOLOGÍA**  **CRÓNICA** | **ENFERMEDAD O SITUACIÓN** | **FACTOR DE RIESGO EN ATENCIÓN PRIMARIA** | **CÓDIGO**  **CIAP-2** |
| --- | --- | --- | --- |
|  | Enfermedades cardiovasculares, y respiratorias crónicas | Insuficiencia cardiaca  Cardiopatía isquémica  Otras enfermedades cardiovasculares  EPOC  Otras enfermedades pulmonares  Accidente cerebrovascular | K77  K74, K75, K76  K78, K82, K83, K84  R95, R79  R84, R85, R89  K90, K91 |
| Insuficiencia renal crónica, síndrome nefrótico, receptores de hemodiálisis | Insuficiencia renal crónica/nefropatía | U88, U99.01 |
| Enfermedad hepática crónica y cirrosis hepática | Inmunodeficiencias:  - Hepatitis crónicas | D72 |
| Diabetes Mellitus | Diabetes Mellitus Tipo 1 y 2 | T89, T90 |
| Alcoholismo y tabaquismo crónico | Inmunodeficiencias:   - Abuso crónico de Alcohol - Cirrosis | P15  D97 |
| Fístula de Líquido cefalorraquídeo | No identificado |  |
| Implantes cocleares o susceptibles de recibirlos | No identificado |  |
| Receptores de concentrados de factores de coagulación | No identificado |  |
| Antecedentes de enfermedad invasora por S. Pneumoniae | No identificado |  |
| Enfermedad neurológica y neuromuscular grave | No identificado |  |
| Personas institucionalizadas | No identificado |  |
| **GRUPO DE**  **ALTO RIESGO** | **ENFERMEDAD O SITUACIÓN** | **FACTOR DE RIESGO EN ATENCIÓN PRIMARIA** | **CÓDIGO CIAP2** |
|  | Asplenia anatómica: si esplenectomía quirúrgica | Rotura traumática de bazo | B76 |
| Asplenia Funcional: drepanocitosis, déficit de componentes finales del complemento y otras hemoglobinopatías que cursen con asplenia funcional (Ejemplo: esferocitosis) | No identificado |  |
| Inmunosupresión por infección VIH | Infección por VIH, SIDA | B90 |
| Enfermedades inmunosupresoras | Enfermedad de Hodgkin/linfoma  Leucemia  Otras neoplasias malignas hematológicas  Otras anomalías congénitas inmunológicas | B72  B73  B74  B79 |
| Tratamiento con fármacos inmunosupresores o quimioterapia | No identificado |  |
| VIH: Virus inmunodeficiencia humana. SIDA: Síndrome de inmunodeficiencia adquirida.  CIAP-2: Clasificación Internacional de Atención Primaria-2 | | | |
